# Supplementary material for: The Development of a Chinese Healthy Eating Index and Its Application in the General Population
Source: MDPI journal article supplement (doi:10.3390/nu9090977), 2017-09-05
Supplement: s1 [file s1]

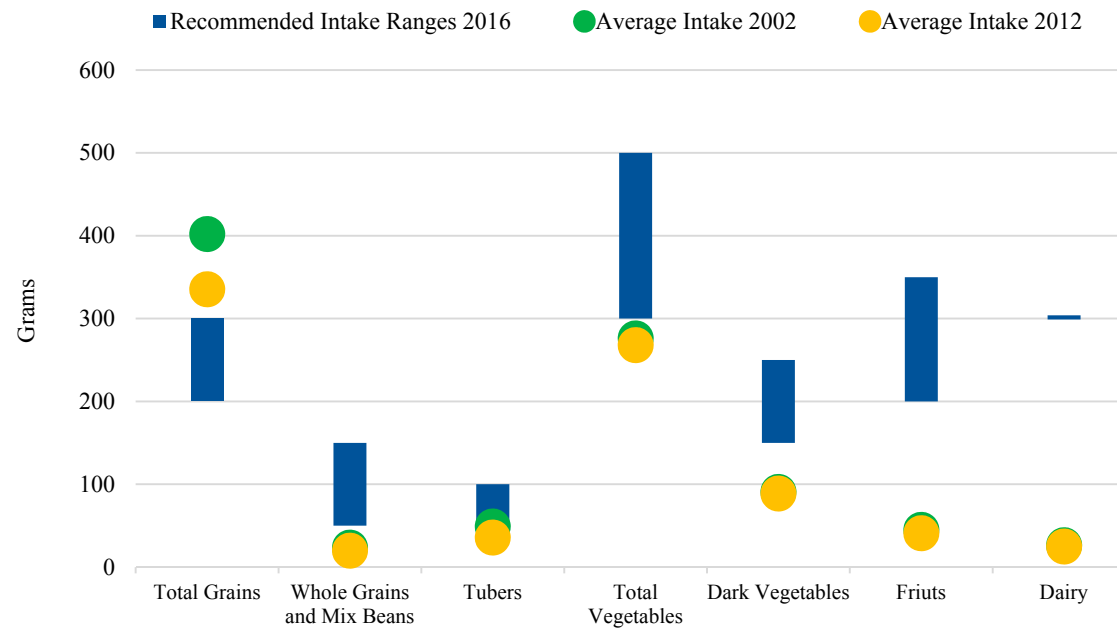

(a)

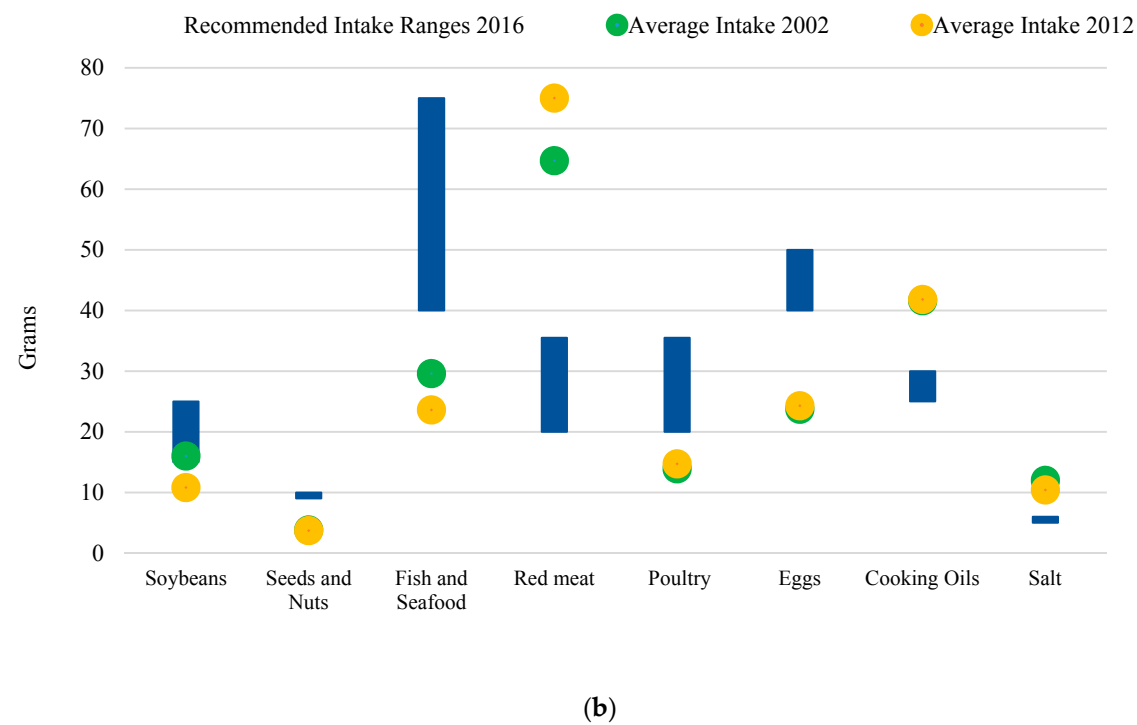

**Figure S1.** Current nutritional status of China. Added sugars were not included in Supplementary Figure S1a,b because the data sources were from the Chinese Nutrition and Health Surveillance 2002 and 2012, which did not incorporate the data on added sugars.

**Table S1.** Standard portion (SP) size for 10 major food groups based on the DGC-2016.

| Food categories                     | Energy per SP (kcal) | Carbohydrate per SP (g) | Protein per SP (g) | Fat per SP (g) | Examples of one SP                                                                   |
|-------------------------------------|----------------------|-------------------------|--------------------|----------------|--------------------------------------------------------------------------------------|
| Grains                              | 160–180              | 35–40                   | 4–7                | 0–2            | wheat flour 50 g, wheat bun 70–80 g<br>rice (raw) 50 g, rice (steamed) 100–120 g     |
| Tubers                              | 80–90                | 18–22                   | 0–4                | 0–1            | potato 100 g, sweet potato 80 g                                                      |
| Vegetables                          | 15–35                | 3–7                     | 1–3                | 0–1            | spinach 100 g, snow pea 80 g                                                         |
| Fruits                              | 40–55                | 10–15                   | 0–1                | 0–1            | apple 100 g, Chinese date 25 g,<br>pear 100 g, persimmon 65 g                        |
| Dairy<br>(whole fat% $\approx$ 3%)  | 110                  | 10–20                   | 5–6                | 5–7            | milk 200 mL, cheese 20–25 g,                                                         |
| (low fat% $<$ 0.5%)                 | 55                   |                         |                    | 2–3            | milk powder 20–30 g                                                                  |
| Soybeans and<br>products            | 65–80                | 4–8                     | 6–8                | 3–8            | soybean 20 g, soybean curd 60 g<br>soybean curd slab 45 g<br>soybean milk 360–380 mL |
| Seeds and Nuts                      | 40–55                | 1–10                    | 1–3                | 2–4            | peanut 10 g, chestnut 25 g<br>lotus seed 20 g                                        |
| Fish                                | 50–60                | 0–5                     | 6–10               | 1–4            | grass carp 50 g, shrimp 50 g,                                                        |
| Seafood                             | 35–50                |                         |                    |                | hairtail 45 g, clam 45 g                                                             |
| Meat and Poultry<br>(fat % $<$ 10%) | 40–50                | 0–5                     | 5–10               | 1–5            | lean meat 50 g, streaky pork 25 g                                                    |
| (fat% $\geq$ 10%)                   | 10–25                |                         | 2–8                | 5–8            |                                                                                      |
| Eggs                                | 40–50                | 1–3                     | 7                  | 5–10           | Eggs 50 g                                                                            |

**Table S2.** Recommended amounts of food groups, expressed in grams\* (a) and expressed in standard portion (SP) size\* (b).

[illegible]

|                  |      |      |      |      |      |      |      |      |      |      |      |
|------------------|------|------|------|------|------|------|------|------|------|------|------|
| Fish and Seafood | 0.3  | 0.4  | 0.9  | 0.9  | 1.1  | 1.1  | 1.7  | 1.7  | 1.7  | 2.2  | 2.8  |
| Meat and Poultry | 0.3  | 0.6  | 0.9  | 0.9  | 1.1  | 1.1  | 1.7  | 1.7  | 1.7  | 2.2  | 2.2  |
| Eggs             | 0.4  | 0.6  | 0.6  | 0.9  | 0.9  | 1.1  | 1.1  | 1.1  | 1.1  | 1.1  | 1.1  |
| Cooking Oils (g) | 15.0 | 20.0 | 20.0 | 25.0 | 25.0 | 25.0 | 25.0 | 30.0 | 30.0 | 30.0 | 35.0 |

\* Specific recommended amounts for Whole Grains and Mixed Beans at 1000–1400 and 2600–3000 calories, for Tubers at 1000–1400 calories, and for Seeds and Nuts at 1000–1400 calories are not given by the Dietary Guideline for Chinese-2016, and they should be appropriate amounts.
